# Supplementary material for: Axial heteroatom (P, S and Cl)-decorated Fe single-atom catalyst for the oxygen reduction reaction: a DFT study
Source: Royal Society of Chemistry journal article supplement (doi:10.1039/d4ra01754d), 2024-01-01
Supplement: d4ra01754d1.pdf [file d4ra01754d1.pdf]

## DFT Study of Oxygen Reduction Reaction Catalyzed by Single Fe Atom Catalyst Decorated with Axial Ligand

Qian Xue<sup>a,b</sup>, Xuede Qi<sup>a,b</sup>, Kun Li<sup>a</sup>, Yi Zeng<sup>a</sup>, Feng Xu<sup>a</sup>, Kai Zhang<sup>a</sup>, Xueqiang Qi<sup>a,b,\*</sup>, Li Li<sup>c,\*</sup>,  
Andreu Cabot<sup>b,d,\*</sup>

<sup>a</sup> College of Chemistry and Chemical Engineering, Chongqing University of Technology, Chongqing 400054, China. Email: xqqi@cqut.edu.cn

<sup>b</sup> Catalonia Institute for Energy Research (IREC), Sant Adrià de Besòs, Barcelona 08930, Spain. Email: acabot@irec.cat

<sup>c</sup> School of Chemistry and Chemical Engineering, Chongqing University, Chongqing 400044, China. Email: liliracial@cqu.edu.cn

<sup>d</sup> ICREA, Pg. Lluís Companys 23, 08010 Barcelona, Catalonia, Spain

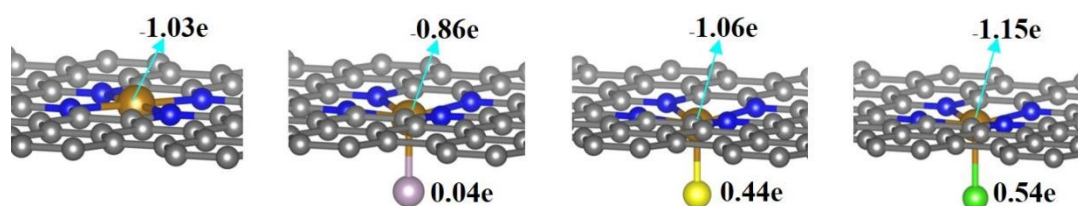

Figure S1 The Bader charge analysis of FeN<sub>4</sub>, FeN<sub>4</sub>P, FeN<sub>4</sub>S, and FeN<sub>4</sub>Cl, respectively.

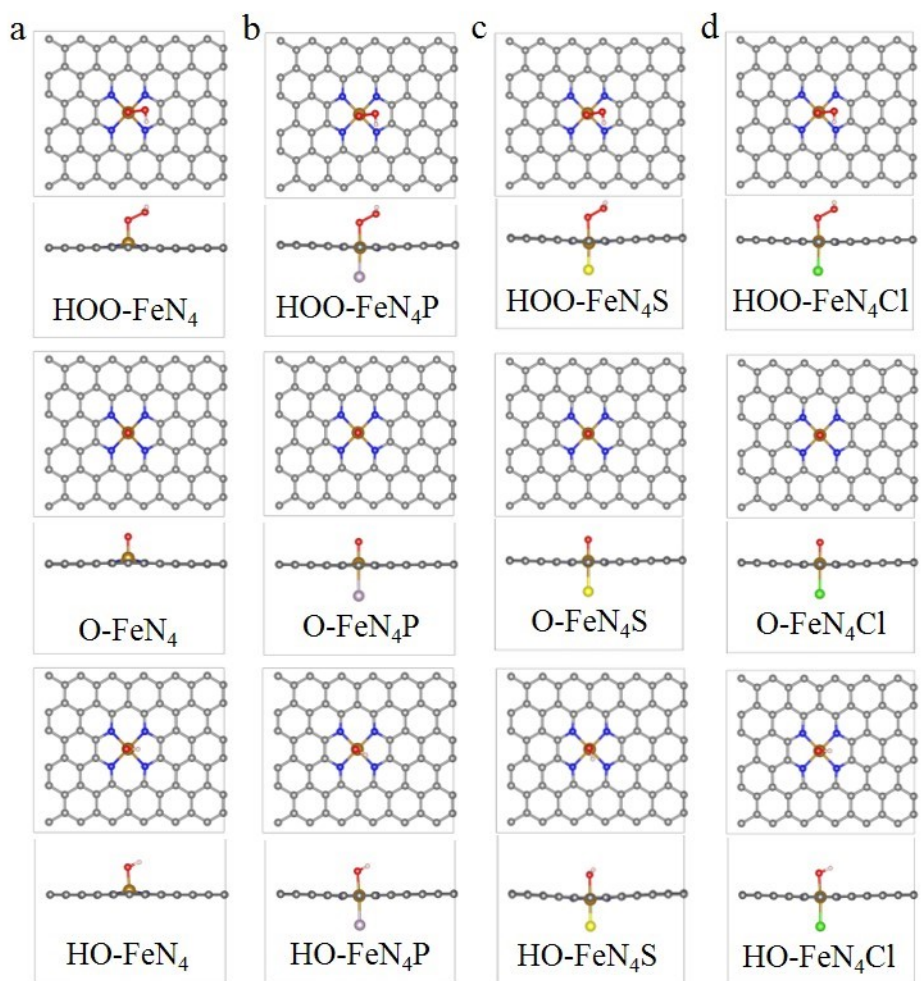

Figure S2 The geometric arrangements of OOH, O, and OH adsorbed on the surfaces of (a)  $\text{FeN}_4$ , (b)  $\text{FeN}_4\text{P}$ , (c)  $\text{FeN}_4\text{S}$ , and (d)  $\text{FeN}_4\text{Cl}$  during catalytic ORR.

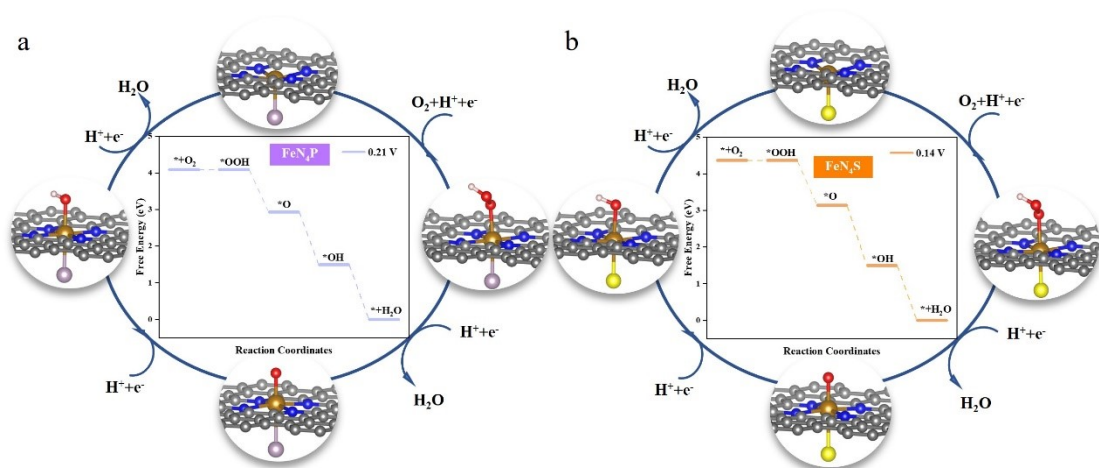

Figure S3 Schematic of the ORR. The inset in the cycle shows the free energy diagram for oxygen reduction reaction on (a)  $\text{FeN}_4\text{P}$  and (b)  $\text{FeN}_4\text{S}$ .

Table S1 The adsorption free energy of ORR intermediates on various catalysts.

| <i>System</i>       | <i>Adsorption free energy (<math>\Delta G_{ads}</math>) / eV</i> |      |      |
|---------------------|------------------------------------------------------------------|------|------|
|                     | *OOH                                                             | *O   | *OH  |
| FeN <sub>4</sub>    | 3.62                                                             | 1.45 | 0.65 |
| FeN <sub>4</sub> P  | 4.71                                                             | 3.35 | 1.70 |
| FeN <sub>4</sub> S  | 4.78                                                             | 3.42 | 1.63 |
| FeN <sub>4</sub> Cl | 4.20                                                             | 2.31 | 1.17 |
